# Supplementary material for: Experimental charge density and topological properties of 3-(tert-butyloxycarbonylamino)bicyclo[1.1.1]pentanecarboxylic acidElectronic supplementary information (ESI) available: multipole population coefficients and a summary of topological descriptors from experiment and theoretical calculations. See http://www.rsc.org/suppdata/p2/b1/b104062f/
Source: Royal Society of Chemistry journal article supplement (doi:10.1039/b104062f), 2001-08-31
Supplement: b104062f1.pdf [file b104062f1.pdf]

## Multipole population coefficients

| atom   | $P_v$    | $P_{00}$ | $P_{11}$  | $P_{1-1}$ | $P_{10}$  |
|--------|----------|----------|-----------|-----------|-----------|
| O(3)   | 6.25( 4) | 0.00( 0) | -0.01( 1) | -0.09( 1) | 0.00( 0)  |
| O(4)   | 6.39( 3) | 0.00( 0) | -0.08( 2) | -0.04( 1) | -0.03( 2) |
| O(1)   | 6.71( 4) | 0.00( 0) | -0.01( 2) | 0.07( 1)  | -0.18( 2) |
| O(2)   | 6.57( 4) | 0.00( 0) | 0.00( 2)  | -0.01( 1) | -0.06( 2) |
| N(1)   | 5.53( 5) | 0.00( 0) | -0.04( 2) | -0.12( 1) | 0.00( 0)  |
| C(1)   | 4.08( 3) | 0.00( 0) | -0.04( 1) | 0.03( 1)  | -0.07( 2) |
| C(2)   | 4.54( 3) | 0.00( 0) | 0.00( 0)  | 0.00( 0)  | -0.15( 1) |
| C(3)   | 3.98( 3) | 0.00( 0) | 0.00( 1)  | -0.01( 1) | -0.12( 2) |
| C(4)   | 4.34( 4) | 0.00( 0) | 0.00( 0)  | 0.00( 0)  | -0.19( 2) |
| C(5)   | 4.54( 0) | 0.00( 0) | 0.00( 0)  | 0.00( 0)  | -0.15( 0) |
| C(6)   | 3.94( 5) | 0.00( 0) | 0.02( 2)  | -0.08( 2) | 0.00( 0)  |
| C(7)   | 3.86( 4) | 0.00( 0) | 0.00( 0)  | 0.00( 0)  | 0.01( 1)  |
| C(8)   | 4.85( 3) | 0.00( 0) | 0.00( 0)  | 0.00( 0)  | -0.14( 1) |
| C(9)   | 4.85( 0) | 0.00( 0) | 0.00( 0)  | 0.00( 0)  | -0.14( 0) |
| C(10)  | 4.85( 0) | 0.00( 0) | 0.00( 0)  | 0.00( 0)  | -0.14( 0) |
| C(11)  | 3.87( 5) | 0.00( 0) | 0.11( 2)  | 0.03( 2)  | 0.02( 2)  |
| H(1)   | 0.71( 3) | 0.00( 0) | 0.00( 0)  | 0.00( 0)  | 0.20( 2)  |
| H(21)  | 0.89( 2) | 0.00( 0) | 0.00( 0)  | 0.00( 0)  | 0.18( 1)  |
| H(22)  | 0.89( 0) | 0.00( 0) | 0.00( 0)  | 0.00( 0)  | 0.18( 0)  |
| H(41)  | 0.89( 2) | 0.00( 0) | 0.00( 0)  | 0.00( 0)  | 0.14( 1)  |
| H(42)  | 0.89( 0) | 0.00( 0) | 0.00( 0)  | 0.00( 0)  | 0.14( 0)  |
| H(51)  | 0.98( 2) | 0.00( 0) | 0.00( 0)  | 0.00( 0)  | 0.18( 1)  |
| H(52)  | 0.98( 0) | 0.00( 0) | 0.00( 0)  | 0.00( 0)  | 0.18( 0)  |
| H(81)  | 0.90( 2) | 0.00( 0) | 0.00( 0)  | 0.00( 0)  | 0.22( 1)  |
| H(82)  | 0.90( 0) | 0.00( 0) | 0.00( 0)  | 0.00( 0)  | 0.22( 0)  |
| H(83)  | 0.90( 0) | 0.00( 0) | 0.00( 0)  | 0.00( 0)  | 0.22( 0)  |
| H(91)  | 0.95( 2) | 0.00( 0) | 0.00( 0)  | 0.00( 0)  | 0.21( 1)  |
| H(92)  | 0.95( 0) | 0.00( 0) | 0.00( 0)  | 0.00( 0)  | 0.21( 0)  |
| H(93)  | 0.95( 0) | 0.00( 0) | 0.00( 0)  | 0.00( 0)  | 0.21( 0)  |
| H(101) | 0.89( 2) | 0.00( 0) | 0.00( 0)  | 0.00( 0)  | 0.21( 1)  |
| H(102) | 0.89( 0) | 0.00( 0) | 0.00( 0)  | 0.00( 0)  | 0.21( 0)  |
| H(103) | 0.89( 0) | 0.00( 0) | 0.00( 0)  | 0.00( 0)  | 0.21( 0)  |
| H(10)  | 0.67( 3) | 0.00( 0) | 0.00( 0)  | 0.00( 0)  | 0.16( 2)  |

| atom  | $P_{20}$  | $P_{21}$  | $P_{2-1}$ | $P_{22}$  | $P_{2-2}$ |
|-------|-----------|-----------|-----------|-----------|-----------|
| O(3)  | -0.01( 2) | 0.00( 0)  | 0.00( 0)  | -0.05( 1) | 0.05( 1)  |
| O(4)  | -0.06( 2) | 0.04( 1)  | 0.03( 2)  | -0.09( 1) | 0.02( 1)  |
| O(1)  | -0.05( 2) | 0.00( 2)  | -0.04( 2) | -0.04( 1) | 0.00( 2)  |
| O(2)  | -0.07( 2) | 0.00( 2)  | 0.03( 2)  | -0.05( 2) | 0.00( 1)  |
| N(1)  | -0.07( 2) | 0.00( 0)  | 0.00( 0)  | -0.03( 1) | 0.07( 1)  |
| C(1)  | 0.05( 2)  | 0.02( 1)  | 0.01( 1)  | 0.00( 1)  | -0.01( 1) |
| C(2)  | 0.14( 1)  | 0.00( 0)  | 0.00( 0)  | 0.10( 1)  | 0.00( 0)  |
| C(3)  | 0.01( 2)  | 0.01( 1)  | -0.01( 1) | -0.06( 1) | 0.03( 1)  |
| C(4)  | 0.13( 2)  | 0.00( 0)  | 0.00( 0)  | 0.13( 2)  | 0.00( 0)  |
| C(5)  | 0.14( 0)  | 0.00( 0)  | 0.00( 0)  | 0.10( 0)  | 0.00( 0)  |
| C(6)  | -0.41( 2) | 0.00( 0)  | 0.00( 0)  | -0.06( 2) | 0.06( 2)  |
| C(7)  | -0.10( 2) | 0.00( 0)  | 0.00( 0)  | 0.00( 0)  | 0.00( 0)  |
| C(8)  | -0.04( 1) | 0.00( 0)  | 0.00( 0)  | 0.00( 0)  | 0.00( 0)  |
| C(9)  | -0.04( 0) | 0.00( 0)  | 0.00( 0)  | 0.00( 0)  | 0.00( 0)  |
| C(10) | -0.04( 0) | 0.00( 0)  | 0.00( 0)  | 0.00( 0)  | 0.00( 0)  |
| C(11) | -0.31( 2) | -0.01( 2) | -0.01( 2) | 0.11( 2)  | 0.01( 2)  |

| atom  | $P_{30}$  | $P_{31}$  | $P_{3-1}$ | $P_{32}$  | $P_{3-2}$ | $P_{33}$  | $P_{3-3}$ |
|-------|-----------|-----------|-----------|-----------|-----------|-----------|-----------|
| O(3)  | 0.00( 0)  | 0.02( 1)  | -0.07( 1) | 0.00( 0)  | 0.00( 0)  | 0.09( 1)  | 0.01( 1)  |
| O(4)  | 0.01( 2)  | 0.14( 2)  | -0.06( 1) | 0.02( 1)  | 0.02( 1)  | 0.04( 1)  | 0.02( 1)  |
| O(1)  | -0.08( 2) | 0.15( 2)  | -0.04( 2) | -0.05( 2) | -0.01( 1) | 0.10( 1)  | 0.01( 1)  |
| O(2)  | -0.08( 1) | 0.03( 1)  | 0.00( 1)  | -0.01( 1) | 0.02( 1)  | 0.03( 1)  | 0.02( 1)  |
| N(1)  | 0.00( 0)  | 0.03( 2)  | 0.01( 1)  | 0.00( 0)  | 0.00( 0)  | 0.22( 1)  | 0.01( 1)  |
| C(1)  | 0.28( 2)  | -0.02( 2) | 0.03( 2)  | -0.02( 2) | 0.01( 2)  | -0.03( 1) | -0.14( 2) |
| C(2)  | 0.01( 1)  | 0.00( 0)  | 0.00( 0)  | -0.29( 1) | 0.00( 0)  | 0.00( 0)  | 0.00( 0)  |
| C(3)  | 0.33( 2)  | -0.03( 1) | -0.03( 2) | -0.02( 2) | 0.01( 1)  | 0.04( 1)  | -0.18( 2) |
| C(4)  | -0.02( 2) | 0.00( 0)  | 0.00( 0)  | -0.25( 2) | 0.00( 0)  | 0.00( 0)  | 0.00( 0)  |
| C(5)  | 0.01( 0)  | 0.00( 0)  | 0.00( 0)  | -0.29( 0) | 0.00( 0)  | 0.00( 0)  | 0.00( 0)  |
| C(6)  | 0.00( 0)  | 0.08( 2)  | 0.07( 2)  | 0.00( 0)  | 0.00( 0)  | 0.41( 2)  | -0.10( 2) |
| C(7)  | 0.29( 2)  | 0.00( 0)  | 0.00( 0)  | 0.00( 0)  | 0.00( 0)  | 0.25( 2)  | 0.00( 0)  |
| C(8)  | 0.35( 1)  | 0.00( 0)  | 0.00( 0)  | 0.00( 0)  | 0.00( 0)  | 0.21( 1)  | 0.00( 0)  |
| C(9)  | 0.35( 0)  | 0.00( 0)  | 0.00( 0)  | 0.00( 0)  | 0.00( 0)  | 0.21( 0)  | 0.00( 0)  |
| C(10) | 0.35( 0)  | 0.00( 0)  | 0.00( 0)  | 0.00( 0)  | 0.00( 0)  | 0.21( 0)  | 0.00( 0)  |
| C(11) | 0.05( 2)  | 0.05( 2)  | -0.02( 2) | 0.06( 2)  | 0.03( 2)  | 0.35( 2)  | -0.02( 2) |

| atom  | $P_{40}$  | $P_{41}$  | $P_{4-1}$ | $P_{42}$  | $P_{4-2}$ | $P_{43}$  | $P_{4-3}$ | $P_{44}$  | $P_{4-4}$ |
|-------|-----------|-----------|-----------|-----------|-----------|-----------|-----------|-----------|-----------|
| O(3)  | -0.02( 2) | 0.00( 0)  | 0.00( 0)  | -0.03( 2) | 0.00( 1)  | 0.00( 0)  | 0.00( 0)  | 0.00( 1)  | 0.00( 1)  |
| O(4)  | -0.02( 2) | -0.06( 2) | 0.02( 2)  | 0.05( 2)  | -0.04( 2) | 0.00( 1)  | 0.02( 1)  | 0.02( 1)  | 0.02( 1)  |
| O(1)  | -0.05( 2) | -0.04( 2) | -0.01( 2) | -0.05( 2) | 0.00( 2)  | 0.03( 2)  | 0.01( 2)  | 0.01( 1)  | 0.04( 1)  |
| O(2)  | 0.00( 2)  | -0.02( 2) | 0.00( 1)  | -0.01( 2) | 0.00( 1)  | 0.05( 1)  | 0.04( 1)  | -0.01( 1) | -0.01( 1) |
| N(1)  | 0.05( 2)  | 0.00( 0)  | 0.00( 0)  | 0.02( 2)  | 0.00( 2)  | 0.00( 0)  | 0.00( 0)  | 0.05( 2)  | -0.01( 2) |
| C(1)  | 0.02( 2)  | 0.00( 2)  | -0.03( 2) | -0.06( 2) | 0.06( 2)  | 0.05( 2)  | 0.09( 2)  | 0.03( 2)  | -0.02( 2) |
| C(2)  | -0.03( 2) | 0.00( 0)  | 0.00( 0)  | -0.08( 2) | 0.00( 0)  | 0.00( 0)  | 0.00( 0)  | 0.11( 1)  | 0.00( 0)  |
| C(3)  | 0.01( 2)  | -0.01( 2) | 0.05( 2)  | -0.02( 2) | 0.00( 2)  | -0.07( 2) | 0.14( 2)  | 0.00( 2)  | -0.03( 2) |
| C(4)  | -0.08( 2) | 0.00( 0)  | 0.00( 0)  | 0.01( 2)  | 0.00( 0)  | 0.00( 0)  | 0.00( 0)  | 0.11( 2)  | 0.00( 0)  |
| C(5)  | -0.03( 0) | 0.00( 0)  | 0.00( 0)  | -0.08( 0) | 0.00( 0)  | 0.00( 0)  | 0.00( 0)  | 0.11( 0)  | 0.00( 0)  |
| C(6)  | 0.08( 2)  | 0.00( 0)  | 0.00( 0)  | 0.11( 2)  | -0.03( 2) | 0.00( 0)  | 0.00( 0)  | 0.06( 2)  | -0.02( 2) |
| C(7)  | 0.20( 2)  | 0.00( 0)  | 0.00( 0)  | 0.00( 0)  | 0.00( 0)  | 0.00( 2)  | 0.00( 0)  | 0.00( 0)  | 0.00( 0)  |
| C(8)  | 0.11( 1)  | 0.00( 0)  | 0.00( 0)  | 0.00( 0)  | 0.00( 0)  | -0.05( 1) | 0.00( 0)  | 0.00( 0)  | 0.00( 0)  |
| C(9)  | 0.11( 0)  | 0.00( 0)  | 0.00( 0)  | 0.00( 0)  | 0.00( 0)  | -0.05( 0) | 0.00( 0)  | 0.00( 0)  | 0.00( 0)  |
| C(10) | 0.11( 0)  | 0.00( 0)  | 0.00( 0)  | 0.00( 0)  | 0.00( 0)  | -0.05( 0) | 0.00( 0)  | 0.00( 0)  | 0.00( 0)  |
| C(11) | 0.01( 2)  | -0.04( 2) | 0.00( 2)  | 0.04( 2)  | -0.05( 2) | -0.01( 3) | 0.03( 2)  | -0.12( 3) | -0.04( 2) |
