# Supplementary material for: Experimental charge density and topological properties of 3-(tert-butyloxycarbonylamino)bicyclo[1.1.1]pentanecarboxylic acidElectronic supplementary information (ESI) available: multipole population coefficients and a summary of topological descriptors from experiment and theoretical calculations. See http://www.rsc.org/suppdata/p2/b1/b104062f/
Source: Royal Society of Chemistry journal article supplement (doi:10.1039/b104062f), 2001-08-31
Supplement: b104062f2.pdf [file b104062f2.pdf]

## Deposition

Table 10

Summary of topological data at the bond critical points (BCP, located at  $\mathbf{r}_b$  where  $\nabla\rho(\mathbf{r}_b) = 0$ ). The quantities given are ( $\rho(\mathbf{r}_b)$  and  $\nabla^2\rho(\mathbf{r}_b)$ ) and the ellipticity  $\epsilon$  (defined by  $\epsilon = \frac{\lambda_1}{\lambda_2} - 1$ , with  $\lambda_1, \lambda_2$  being the two principal curvatures of  $\rho(\mathbf{r})$  at a BCP), a measure for the charge asphericity. First row experimental results after multipole refinement, second and third subsequent rows: single point *ab initio* calculations at the experimental geometry, fourth and fifth row: single point *ab initio* calculations after geometry optimization at the HF/6-311+G(d,p) level. Bond length are experimental (first row) and optimized theoretically (second row).

| bond/bond length [Å] | $\rho [e\text{Å}^{-3}]$ | $\nabla^2\rho [e\text{Å}^{-5}]$ | ellipticity | method                        |
|----------------------|-------------------------|---------------------------------|-------------|-------------------------------|
| C(1)–C(2)            | 1.60(2)                 | -10.66(8)                       | 0.10        | multipole                     |
| 1.5612(7)            | 1.59                    | -13.2                           | 0.02        | HF/6-311+G(d,p)(exp. geo.)    |
| 1.5386               | 1.52                    | -10.4                           | 0.02        | B3LYP/6-311+G(d,p)(exp. geo.) |
|                      | 1.67                    | -14.8                           | 0.02        | HF/6-311+G(d,p)(opt. geo.)    |
|                      | 1.54                    | -11.8                           | 0.02        | B3LYP/6-311+G(d,p)(opt. geo.) |
| C(1)–C(4)            | 1.53(3)                 | -9.69(9)                        | 0.15        | multipole                     |
| 1.5548(7)            | 1.62                    | -13.9                           | 0.02        | HF/6-311+G(d,p)(exp. geo.)    |
| 1.5472               | 1.55                    | -10.9                           | 0.02        | B3LYP/6-311+G(d,p)(exp. geo.) |
|                      | 1.63                    | -14.0                           | 0.02        | HF/6-311+G(d,p)(opt. geo.)    |
|                      | 1.56                    | -11.0                           | 0.02        | B3LYP/6-311+G(d,p)(opt. geo.) |
| C(1)–C(5)            | 1.59(3)                 | -11.39(8)                       | 0.09        | multipole                     |
| 1.5553(6)            | 1.60                    | -13.5                           | 0.03        | HF/6-311+G(d,p)(exp. geo.)    |
| 1.5510               | 1.53                    | -10.6                           | 0.02        | B3LYP/6-311+G(d,p)(exp. geo.) |
|                      | 1.61                    | -13.6                           | 0.03        | HF/6-311+G(d,p)(opt. geo.)    |
|                      | 1.54                    | -10.7                           | 0.03        | B3LYP/6-311+G(d,p)(opt. geo.) |
| C(3)–C(2)            | 1.65(2)                 | -13.07(7)                       | 0.15        | multipole                     |
| 1.5613(6)            | 1.63                    | -14.0                           | 0.02        | HF/6-311+G(d,p)(exp. geo.)    |
| 1.5476               | 1.54                    | -10.9                           | 0.02        | B3LYP/6-311+G(d,p)(exp. geo.) |
|                      | 1.67                    | -14.7                           | 0.02        | HF/6-311+G(d,p)(opt. geo.)    |
|                      | 1.59                    | -11.5                           | 0.01        | B3LYP/6-311+G(d,p)(opt. geo.) |
| C(3)–C(4)            | 1.63(3)                 | -12.63(9)                       | 0.08        | multipole                     |
| 1.5493(7)            | 1.66                    | -14.6                           | 0.00        | HF/6-311+G(d,p)(exp. geo.)    |
| 1.5409               | 1.58                    | -11.5                           | 0.00        | B3LYP/6-311+G(d,p)(exp. geo.) |
|                      | 1.69                    | -15.1                           | 0.01        | HF/6-311+G(d,p)(opt. geo.)    |
|                      | 1.60                    | -11.9                           | 0.00        | B3LYP/6-311+G(d,p)(opt. geo.) |
| C(3)–C(5)            | 1.67(3)                 | -13.07(7)                       | 0.10        | multipole                     |
| 1.5554(7)            | 1.65                    | -14.3                           | 0.02        | HF/6-311+G(d,p)(exp. geo.)    |
| 1.5475               | 1.56                    | -11.2                           | 0.02        | B3LYP/6-311+G(d,p)(exp. geo.) |
|                      | 1.67                    | -14.7                           | 0.02        | HF/6-311+G(d,p)(opt. geo.)    |
|                      | 1.59                    | -11.5                           | 0.01        | B3LYP/6-311+G(d,p)(opt. geo.) |
| C(1)–C(11)           | 1.94(3)                 | -21.4(10)                       | 0.03        | multipole                     |
| 1.4949(6)            | 1.88                    | -20.6                           | 0.07        | HF/6-311+G(d,p)(exp. geo.)    |
| 1.4913               | 1.79                    | -16.2                           | 0.07        | B3LYP/6-311+G(d,p)(exp. geo.) |
|                      | 1.90                    | -20.8                           | 0.07        | HF/6-311+G(d,p)(opt. geo.)    |
|                      | 1.80                    | -16.5                           | 0.07        | B3LYP/6-311+G(d,p)(opt. geo.) |
| C(11)–O(1)           | 2.49(4)                 | -32.5(3)                        | 0.23        | multipole                     |
| 1.3257(8)            | 2.10                    | -2.2                            | 0.14        | HF/6-311+G(d,p)(exp. geo.)    |
| 1.3295               | 2.10                    | -9.0                            | 0.03        | B3LYP/6-311+G(d,p)(exp. geo.) |
|                      | 2.08                    | -2.2                            | 0.14        | HF/6-311+G(d,p)(opt. geo.)    |
|                      | 2.09                    | -9.3                            | 0.03        | B3LYP/6-311+G(d,p)(opt. geo.) |
| C(11)–O(2)           | 3.09(5)                 | -36.1(4)                        | 0.10        | multipole                     |
| 1.2274(7)            | 2.75                    | -5.8                            | 0.07        | HF/6-311+G(d,p)(exp. geo.)    |

| bond/bond length [Å] | $\rho [e\text{\AA}^{-3}]$ | $\nabla^2 \rho [e\text{\AA}^{-5}]$ | ellipticity | method                        |
|----------------------|---------------------------|------------------------------------|-------------|-------------------------------|
| 1.1826               | 2.72                      | -9.9                               | 0.09        | B3LYP/6-311+G(d,p)(exp. geo.) |
|                      | 2.99                      | +3.5                               | 0.08        | HF/6-311+G(d,p)(opt. geo.)    |
|                      | 2.98                      | -1.9                               | 0.08        | B3LYP/6-311+G(d,p)(opt. geo.) |
| N(1)–C(3)            | 1.99(4)                   | -27.3(2)                           | 0.09        | multipole                     |
| 1.4331(6)            | 1.83                      | -15.1                              | 0.03        | HF/6-311+G(d,p)(exp. geo.)    |
| 1.4219               | 1.83                      | -17.8                              | 0.06        | B3LYP/6-311+G(d,p)(exp. geo.) |
|                      | 1.87                      | -15.2                              | 0.04        | HF/6-311+G(d,p)(opt. geo.)    |
|                      | 1.87                      | -18.5                              | 0.06        | B3LYP/6-311+G(d,p)(opt. geo.) |
| N(1)–C(6)            | 2.52(4)                   | -26.7(2)                           | 0.26        | multipole                     |
| 1.3579(6)            | 2.26                      | -26.0                              | 0.11        | HF/6-311+G(d,p)(exp. geo.)    |
| 1.3577               | 2.21                      | -24.4                              | 0.19        | B3LYP/6-311+G(d,p)(exp. geo.) |
|                      | 2.25                      | -25.1                              | 0.10        | HF/6-311+G(d,p)(opt. geo.)    |
|                      | 2.21                      | -24.1                              | 0.19        | B3LYP/6-311+G(d,p)(opt. geo.) |
| C(6)–O(3)            | 2.60(4)                   | -33.4(2)                           | 0.02        | multipole                     |
| 1.3294(6)            | 2.13                      | -7.4                               | 0.05        | HF/6-311+G(d,p)(exp. geo.)    |
| 1.3180               | 2.12                      | -12.4                              | 0.05        | B3LYP/6-311+G(d,p)(exp. geo.) |
|                      | 2.16                      | -5.1                               | 0.05        | HF/6-311+G(d,p)(opt. geo.)    |
|                      | 2.16                      | -10.8                              | 0.04        | B3LYP/6-311+G(d,p)(opt. geo.) |
| C(6)–O(4)            | 3.11(5)                   | -42.0(3)                           | 0.05        | multipole                     |
| 1.2406(7)            | 2.72                      | -12.5                              | 0.07        | HF/6-311+G(d,p)(exp. geo.)    |
| 1.1922               | 2.68                      | -14.7                              | 0.11        | B3LYP/6-311+G(d,p)(exp. geo.) |
|                      | 2.97                      | -3.1                               | 0.08        | HF/6-311+G(d,p)(opt. geo.)    |
|                      | 2.94                      | -6.8                               | 0.10        | B3LYP/6-311+G(d,p)(opt. geo.) |
| O(3)–C(7)            | 1.81(4)                   | -19.4(2)                           | 0.01        | multipole                     |
| 1.4845(7)            | 1.36                      | +1.5                               | 0.05        | HF/6-311+G(d,p)(exp. geo.)    |
| 1.4528               | 1.43                      | -7.2                               | 0.01        | B3LYP/6-311+G(d,p)(exp. geo.) |
|                      | 1.45                      | +3.4                               | 0.02        | HF/6-311+G(d,p)(opt. geo.)    |
|                      | 1.52                      | -6.8                               | 0.00        | B3LYP/6-311+G(d,p)(opt. geo.) |
| C(7)–C(8)            | 1.89(2)                   | -20.02(6)                          | 0.08        | multipole                     |
| 1.5215(7)            | 1.79                      | -18.0                              | 0.04        | HF/6-311+G(d,p)(exp. geo.)    |
| 1.5252               | 1.70                      | -14.5                              | 0.03        | B3LYP/6-311+G(d,p)(exp. geo.) |
|                      | 1.78                      | -17.8                              | 0.04        | HF/6-311+G(d,p)(opt. geo.)    |
|                      | 1.69                      | -14.3                              | 0.04        | B3LYP/6-311+G(d,p)(opt. geo.) |
| C(7)–C(9)            | 1.86(2)                   | -18.87(7)                          | 0.07        | multipole                     |
| 1.5220(7)            | 1.78                      | -17.7                              | 0.03        | HF/6-311+G(d,p)(exp. geo.)    |
| 1.5269               | 1.69                      | -14.2                              | 0.03        | B3LYP/6-311+G(d,p)(exp. geo.) |
|                      | 1.76                      | -17.4                              | 0.03        | HF/6-311+G(d,p)(opt. geo.)    |
|                      | 1.67                      | -13.9                              | 0.03        | B3LYP/6-311+G(d,p)(opt. geo.) |
| C(7)–C(10)           | 1.86(2)                   | -18.85(7)                          | 0.07        | multipole                     |
| 1.5242(8)            | 1.77                      | -17.6                              | 0.03        | HF/6-311+G(d,p)(exp. geo.)    |
| 1.5269               | 1.68                      | -14.0                              | 0.03        | B3LYP/6-311+G(d,p)(exp. geo.) |
|                      | 1.76                      | -17.4                              | 0.03        | HF/6-311+G(d,p)(opt. geo.)    |
|                      | 1.67                      | -13.9                              | 0.03        | B3LYP/6-311+G(d,p)(opt. geo.) |
| C(1)–C(3)            | 0.68(2)                   | 11.09(6)                           | –           | multipole                     |
| 1.8680(6)            | 0.66                      | 11.85                              | –           | HF/6-311+G(d,p)(exp. geo.)    |
| 1.8538               | 0.67                      | 11.09                              | –           | B3LYP/6-311+G(d,p)(exp. geo.) |
|                      | 0.68                      | 12.21                              | –           | HF/6-311+G(d,p)(opt. geo.)    |
|                      | 0.69                      | 11.42                              | –           | B3LYP/6-311+G(d,p)(opt. geo.) |
